# Supplementary material for: Contrasting roles of Bi-doping and Bi2Te3 alloying on the thermoelectric performance of SnTe
Source: Royal Society of Chemistry journal article supplement (doi:10.1039/d2qi01437h), 2022-01-01
Supplement: d2qi01437h1.pdf [file d2qi01437h1.pdf]

## Supporting Information

### Contrasting roles of Bi- doping and Bi<sub>2</sub>Te<sub>3</sub> alloying on the thermoelectric performance of SnTe

Fudong Zhang<sup>a,#</sup>, Xia Qi<sup>a,#</sup>, Mingkai He<sup>b</sup>, Fengshan Zheng<sup>c</sup>, Lei Jin<sup>c,\*</sup>, Zhanhui Peng<sup>a</sup>,  
Xiaolian Chao<sup>a</sup>, Zupei Yang<sup>a,\*</sup>, Di, Wu<sup>a,\*</sup>

<sup>a</sup> Key Laboratory for Macromolecular Science of Shaanxi Province, School of Materials Science and Engineering, Shaanxi Normal University, Xi'an 710062, China.

<sup>b</sup> Department of Physics, The Chinese University of Hong Kong, Hong Kong 999077, China

<sup>c</sup> Ernst Ruska-Centre for Microscopy and Spectroscopy with Electrons Forschungszentrum Jülich GmbH  
52428 Jülich, Germany.

# These authors contributed equally to this work.

\*Correspondence shall be addressed to:

E-mails: [l.jin@fz-juelich.de](mailto:l.jin@fz-juelich.de), [yangzp@snnu.edu.cn](mailto:yangzp@snnu.edu.cn), [wud@snnu.edu.cn](mailto:wud@snnu.edu.cn).

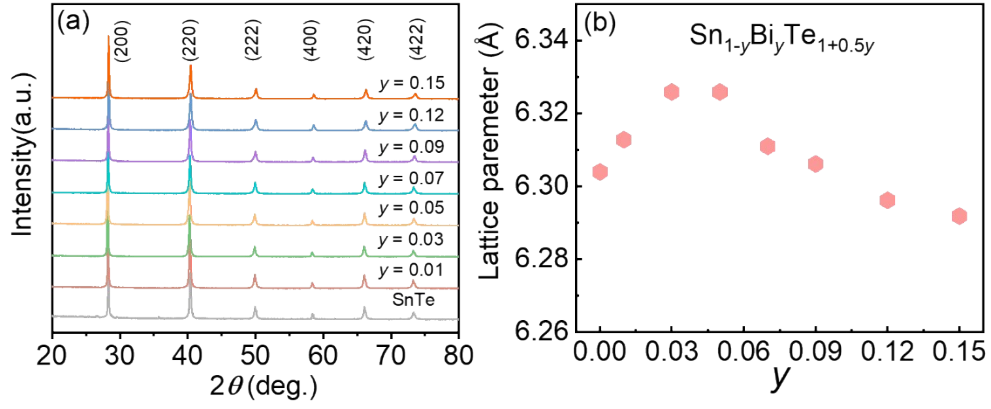

**Figure S1** (a) The powder XRD patterns for  $\text{Sn}_{1-y}\text{Bi}_y\text{Te}_{1+0.5y}$  ( $y = 0, 0.01, 0.03, 0.05, 0.07, 0.09, 0.12, 0.15$ ). (b) Calculated lattice parameters obtained from (a).

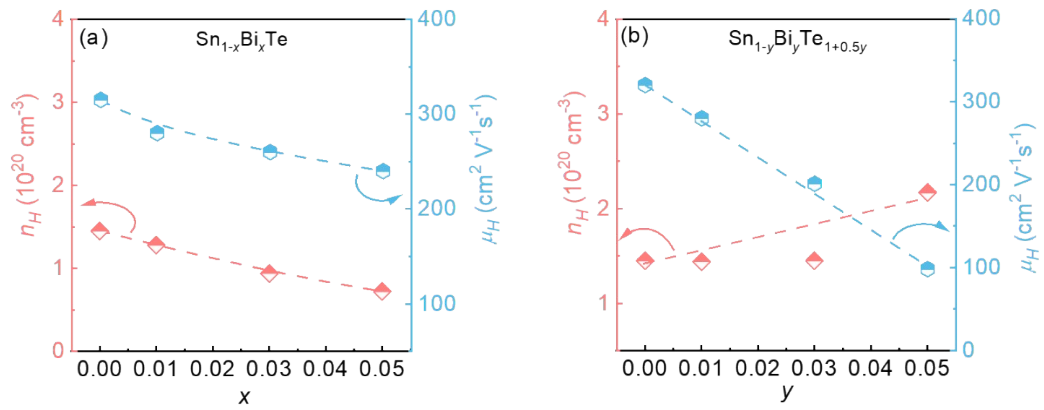

**Figure S2** (a) and (b) Room-temperature carrier concentration ( $n_H$ ) and carrier mobility ( $\mu_H$ ) of  $\text{Sn}_{1-x}\text{Bi}_x\text{Te}$  and  $\text{Sn}_{1-y}\text{Bi}_y\text{Te}_{1+0.5y}$ , respectively.

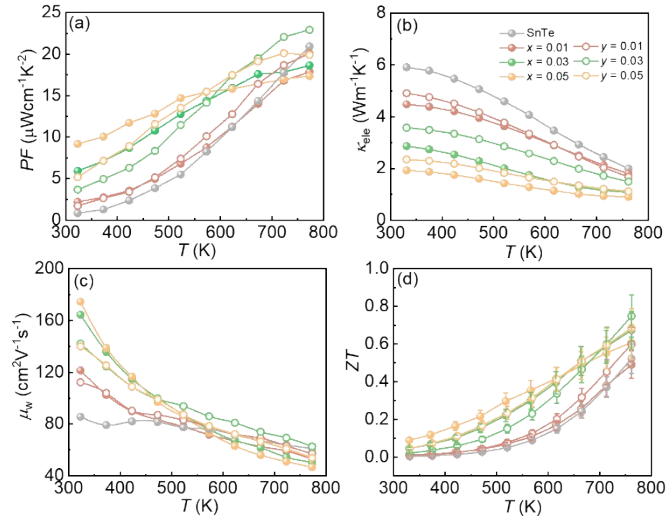

**Figure S3** Temperature dependent (a) power factor, (b) calculated electronic thermal conductivity, (c) calculated weighted carrier mobility, and (d)  $ZT$  of  $\text{Sn}_{1-x}\text{Bi}_x\text{Te}$  ( $x = 0, 0.01, 0.03$  and  $0.05$ ) and  $\text{Sn}_{1-y}\text{Bi}_y\text{Te}_{1+0.5y}$  ( $y = 0, 0.01, 0.03$  and  $0.05$ ).

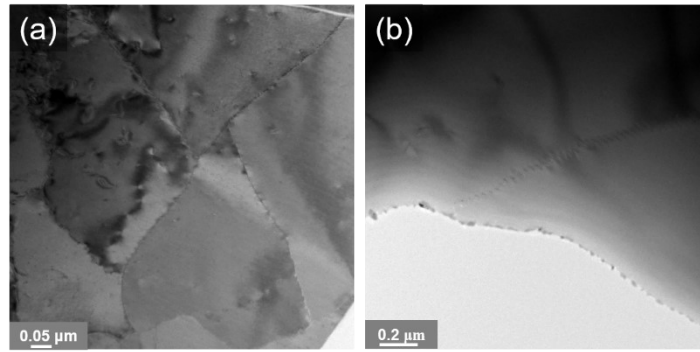

**Figure S4** Low magnification TEM image of  $\text{Sn}_{0.97}\text{Bi}_{0.03}\text{Te}_{1.015}$  sample showing (a) mesoscale grains and (b) dislocation arrays at grain boundaries.

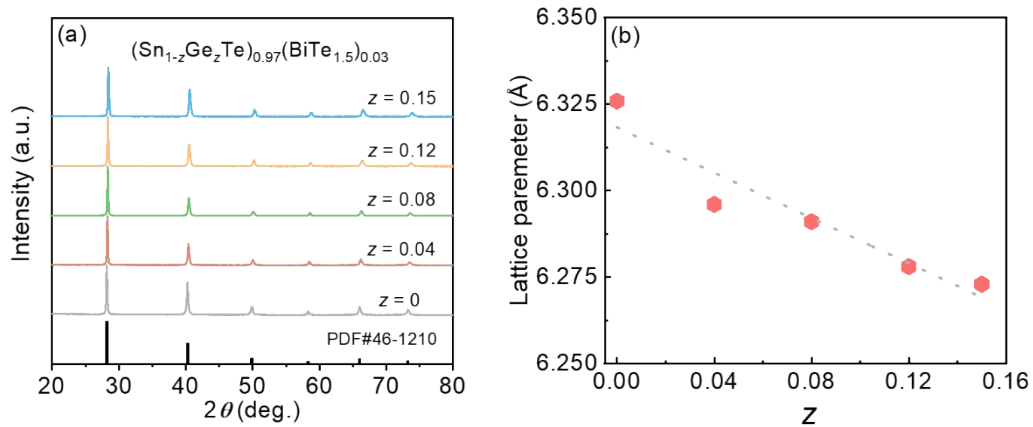

**Figure S5** (a) The powder X-ray diffraction (XRD) patterns and (b) calculated lattice parameters of  $(\text{Sn}_{1-z}\text{Ge}_z\text{Te})_{0.97}(\text{BiTe}_{1.5})_{0.03}$  ( $z = 0, 0.04, 0.08, 0.12$  and  $0.15$ ).

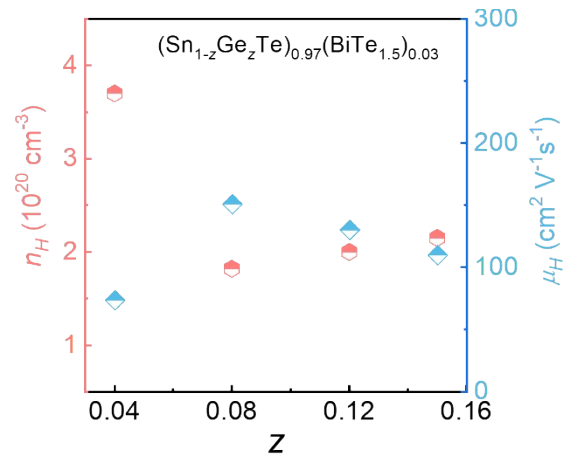

**Figure S6** Room-temperature carrier concentration ( $n_H$ ) and carrier mobility ( $\mu_H$ ) of  $(\text{Sn}_{1-z}\text{Ge}_z\text{Te})_{0.97}(\text{BiTe}_{1.5})_{0.03}$  ( $z = 0.04, 0.08, 0.12$  and  $0.15$ ).
